# Supplementary material for: Uracil Derivatives for Halogen-Bonded Cocrystals
Source: MDPI journal article supplement (doi:10.3390/ijms221910663), 2021-10-01
Supplement: s1 [file s1]

## Supplementary Information

# Uracil Derivatives for Halogen-bonded Cocrystals

Mónica Benito<sup>1,\*</sup>, Yannick Roselló<sup>2,†</sup>, Miquel Barceló-Oliver<sup>2</sup>, Antonio Frontera<sup>2,\*</sup> and Elies Molins<sup>1,\*</sup>

<sup>1</sup>Institut de Ciència de Materials de Barcelona (ICMAB-CSIC), Campus UAB, 08193 Bellaterra, Spain; mbenito@icmab.es (M.B.); elies.molins@icmab.es (E.M.)

<sup>2</sup>Departament de Química, Universitat de les Illes Balears, Ctra. Valldemosa km 7.5, E-07122 Palma de Mallorca, Spain; ynkrm11@gmail.com (Y. R.); miquel.barcelo@uib.es (M.B.-O.); toni.frontera@uib.es (A. F.)

<sup>†</sup>Present address: Departament de Química Física i Inorgànica, Universitat Rovira i Virgili, 43007, Tarragona, Spain; yannick.rosello@urv.cat (Y.R.)

## Content

**Figure S1.** Comparison of the powder patterns of adenine (ADE), 1,2,4,5-tetrafluoro-1,3-diiodobenzene (TFDIB) and the mixtures prepared in methanol (MT) or water (WA) and the different ratios used.

**Figure S2.** Comparison of the powder patterns of guanine (GUA), 1,2,4,5-tetrafluoro-1,3-diiodobenzene (TFDIB) and the mixtures prepared in methanol (MT) or water (WA) and the different ratios used.

**Figure S3.** Comparison of the powder patterns of uracil (URA), 1,2,4,5-tetrafluoro-1,3-diiodobenzene (TFDIB) and the mixtures prepared in methanol (MT) or water (WA) and the different ratios used.

**Figure S4.** Comparison of the powder patterns of cytosine (CYT), 1,2,4,5-tetrafluoro-1,3-diiodobenzene (TFDIB) and the mixtures prepared in methanol (MT), water (WA) or nitromethane (NM) and the different ratios used.

**Table S1.** Melting points and solubilities in water of canonical nucleobases.

**Figure S5.** Comparison of ATR-FT-IR spectra of thymine, 1,2,4,5-tetrafluoro-1,3-diiodobenzene (TFDIB) and cocrystal **1**.

**Figure S6.** Comparison of ATR-FT-IR spectra of 1-ethyluracil, 1,2,4,5-tetrafluoro-1,3-diiodobenzene (TFDIB) and cocrystal **2**.

**Figure S7.** Comparison of ATR-FT-IR spectra of 5-fluorouracil, 1,2,4,5-tetrafluoro-1,3-diiodobenzene (TFDIB) and cocrystal **3**.

**Table S2.** Some characteristic frequencies for the modified uracil compounds, the coformer and the new cocrystals.

**Figure S8.** TGA-DSC of the cocrystal **1**.

**Figure S9.** TGA-DSC of the cocrystal **2**.

**Figure S10.** TGA-DSC of the cocrystal **3**.

**Figure S11.** X-bonds angles in cocrystals **1-3**.

**Table S3.** Hydrogen bonds for cocrystals **1** (THY-TFDIB), **2** (1ETURA-TFDIB) and **3** (5FU-TFDIB) [ $\text{\AA}$  and  $^\circ$ ].

**Figure S1.** Comparison of the powder patterns of adenine (ADE), 1,2,4,5-tetrafluoro-1,3-diiodobenzene (TFDIB) and the mixtures prepared in methanol (MT) or water (WA) and the different ratios used.

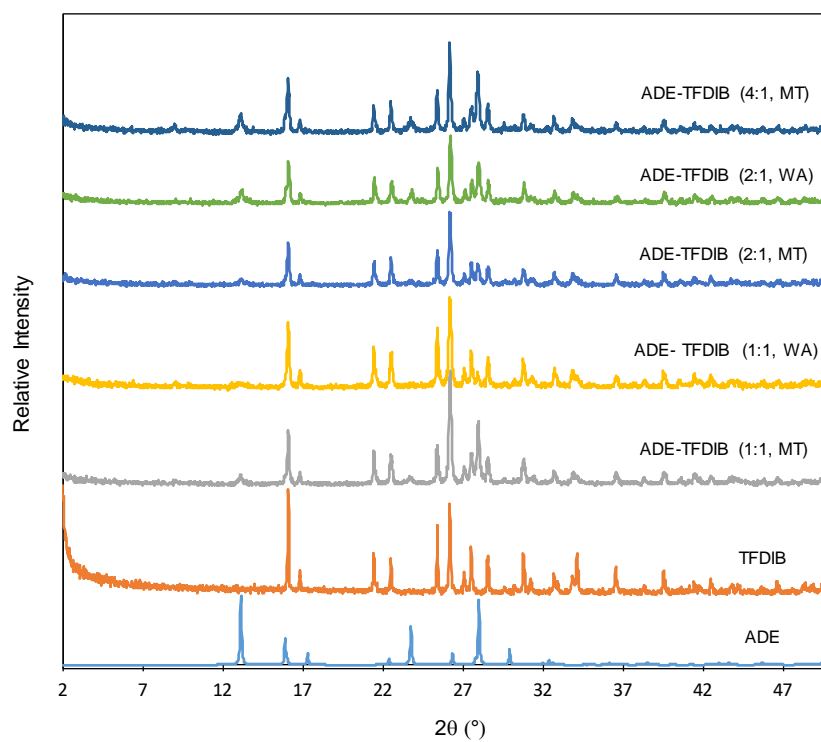

**Figure S2.** Comparison of the powder patterns of guanine (GUA), 1,2,4,5-tetrafluoro-1,3-diiodobenzene (TFDIB) and the mixtures prepared in methanol (MT) or water (WA) and the different ratios used.

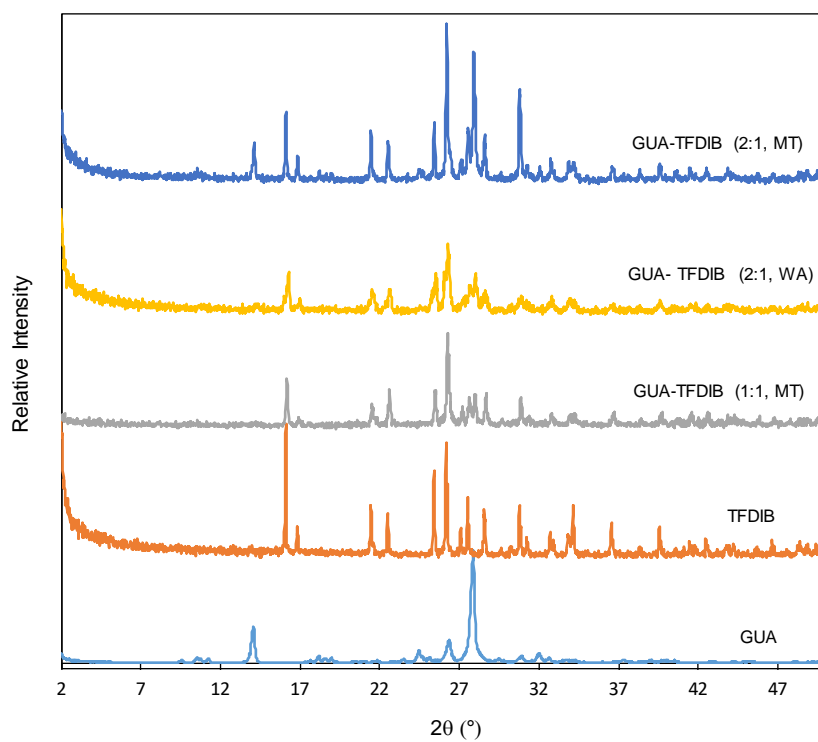

**Figure S3.** Comparison of the powder patterns of uracil (URA), 1,2,4,5-tetrafluoro-1,3-diiodobenzene (TFDIB) and the mixtures prepared in methanol (MT) or water (WA) and the different ratios used.

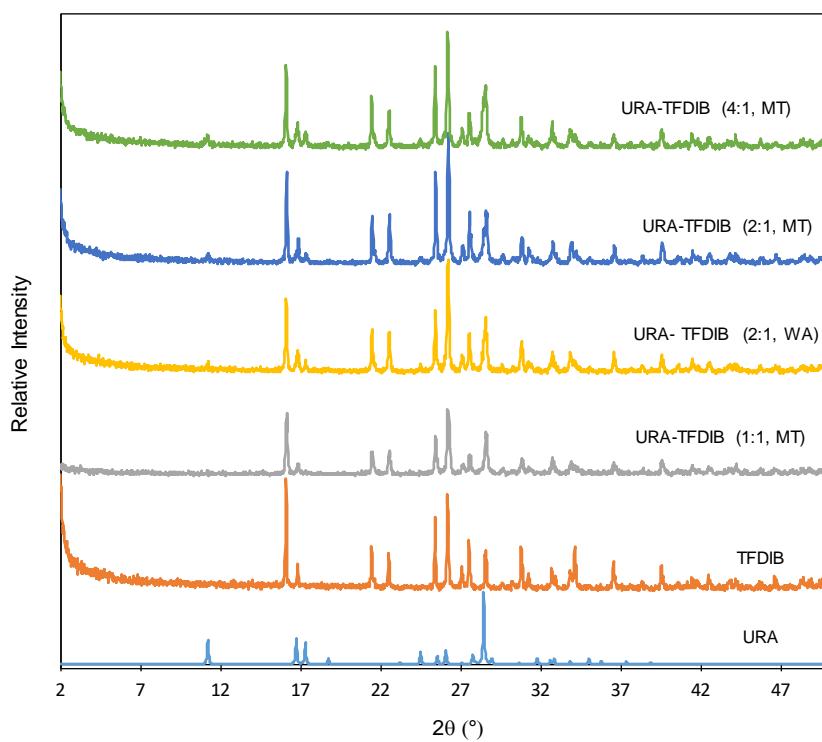

**Figure S4.** Comparison of the powder patterns of cytosine (CYT), 1,2,4,5-tetrafluoro-1,3-diiodobenzene (TFDIB) and the mixtures prepared in methanol (MT), water (WA) or nitromethane (NM) and the different ratios used.

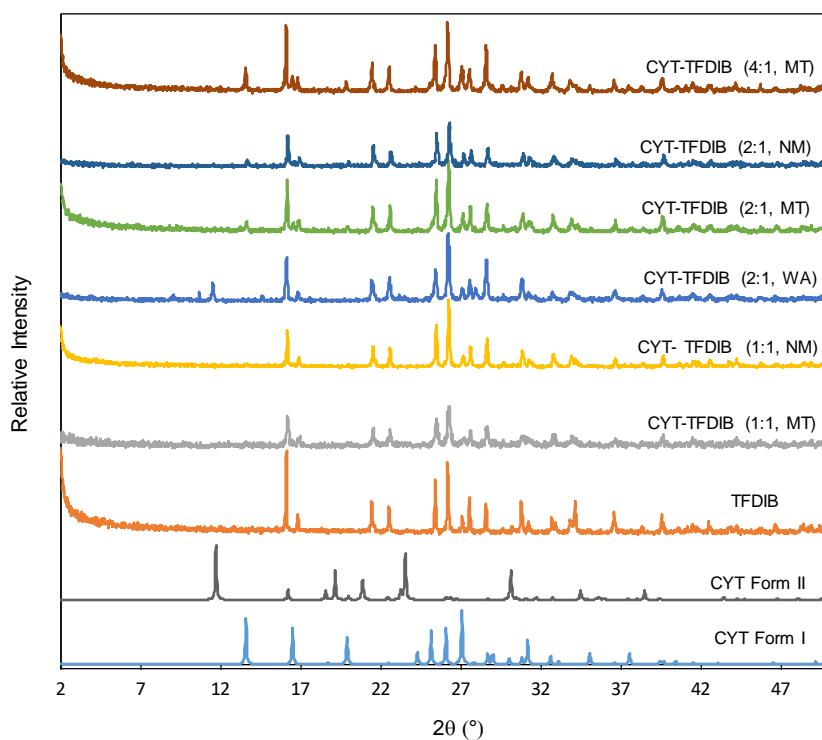

**Table S1.** Melting point and solubilities in water of canonical nucleobases.

| Nucleobase | Mp (°C) | Solubility in water* |
|------------|---------|----------------------|
| Adenine    | 360     | 1030 mg/L (25 °C)    |
| Guanine    | 360     | 2080 mg/L (37 °C)    |
| Uracil     | 338     | 3600 mg/L (25 °C)    |
| Cytosine   | 320-325 | 8 mg/mL (25 °C)      |
| Thymine    | 316     | 3820 mg/L (25 °C)    |

\*DrugBank website.

**Figure S5.** Comparison of ATR-FT-IR spectra of thymine, 1,2,4,5-tetrafluoro-3,6-diiodobenzene (TFDIB) and cocrystal **1**.

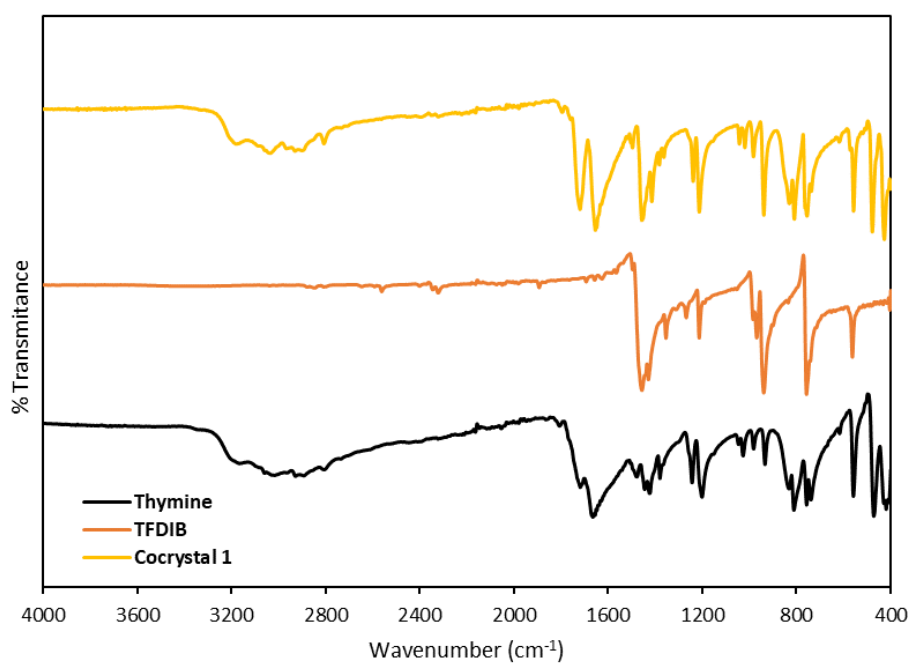

**Figure S6.** Comparison of ATR-FT-IR spectra of 1-ethyluracil, 1,2,4,5-tetrafluoro-3,6-diiodobenzene (TFDIB) and cocrystal **2**.

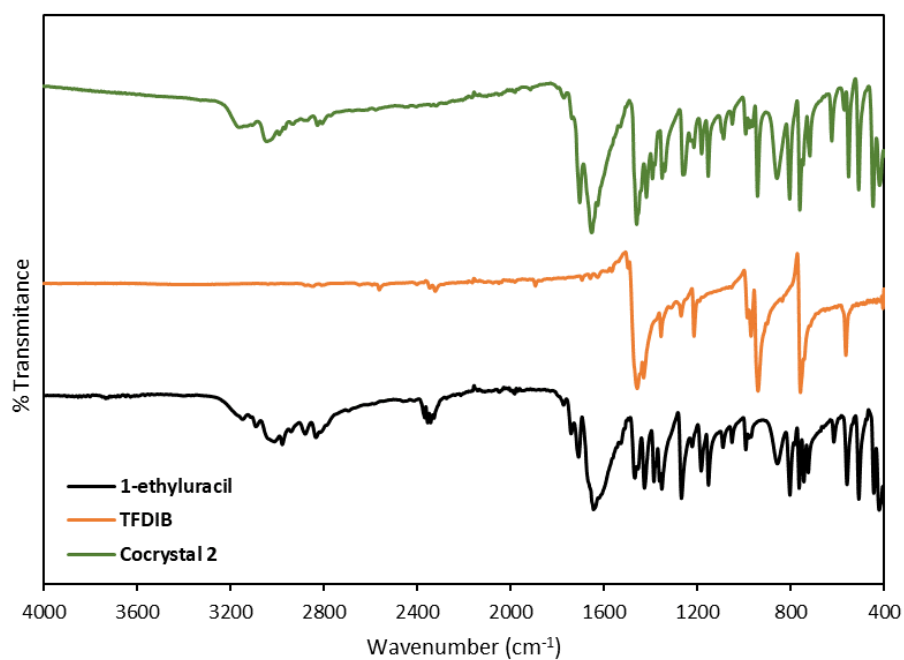

**Figure S7.** Comparison of ATR-FT-IR spectra of 5-fluorouracil, 1,2,4,5-tetrafluoro-3,6-diiodobenzene (TFDIB) and cocrystal **3**.

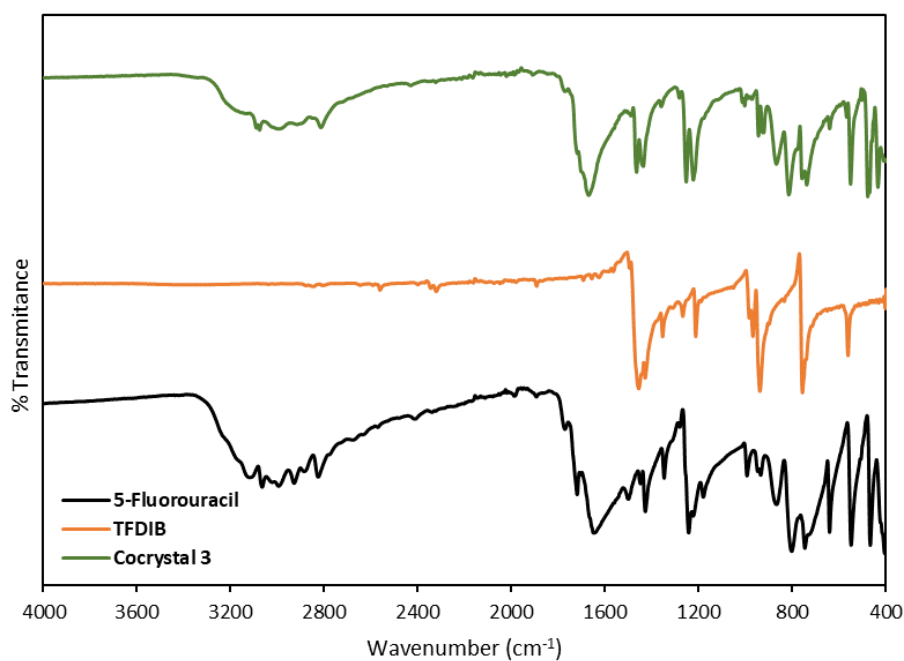



**Table S2.** Some characteristic frequencies for the modified uracil compounds, the coformer and the new cocrystals **1-3**.

|                 | TFDIB | THY       | 1         | 1ETURA         | 2         | 5FU       | 3         |
|-----------------|-------|-----------|-----------|----------------|-----------|-----------|-----------|
| $\nu\text{C-C}$ | 1455  | -         | 1456      | -              | 1458      | -         | 1463      |
| $\nu\text{C-F}$ | 937   | -         | 940       | -              | 937       | -         | 943       |
| $\nu\text{C-I}$ | 755   | -         | 753       | -              | 758       | -         | 758       |
| $\nu\text{C=O}$ | -     | 1720/1667 | 1717/1654 | 1739/1708/1643 | 1704/1651 | 1720/1648 | 1672      |
| $\nu\text{N-H}$ | -     | 3166      | 3179      | 3147/3090      | 3166      | 3115      | 3150/3088 |

**Figure S8.** TGA-DSC of the cocrystal **1**.

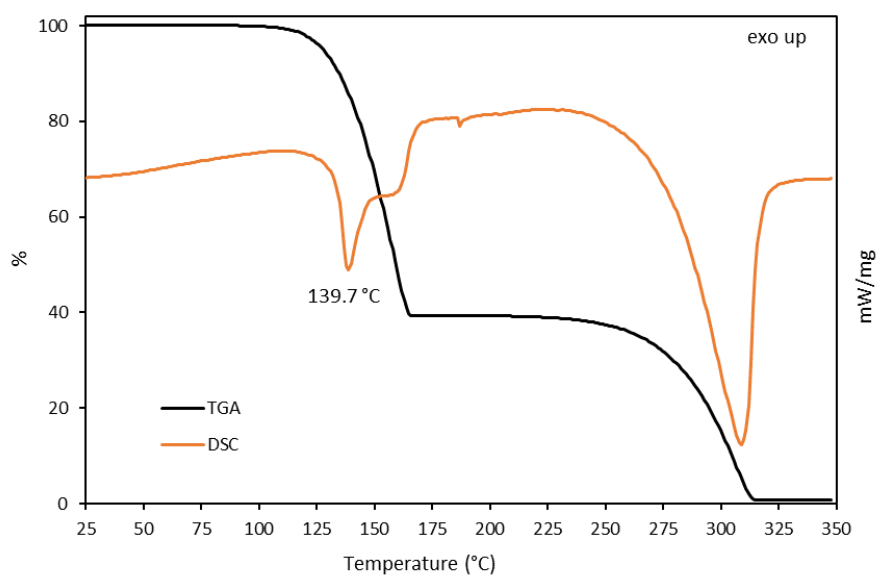

**Figure S9.** TGA-DSC of the cocrystal **2**.

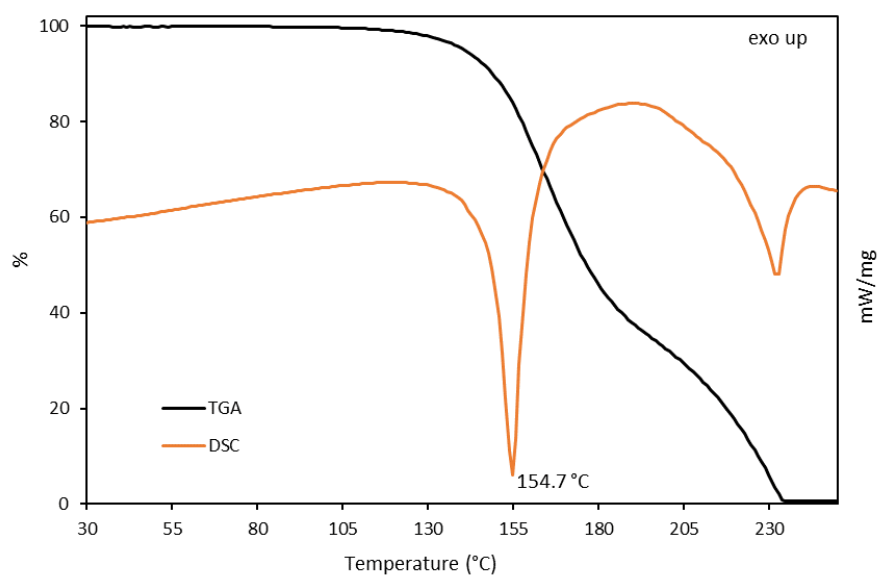

**Figure S10.** TGA-DSC of the cocrystal **3**.

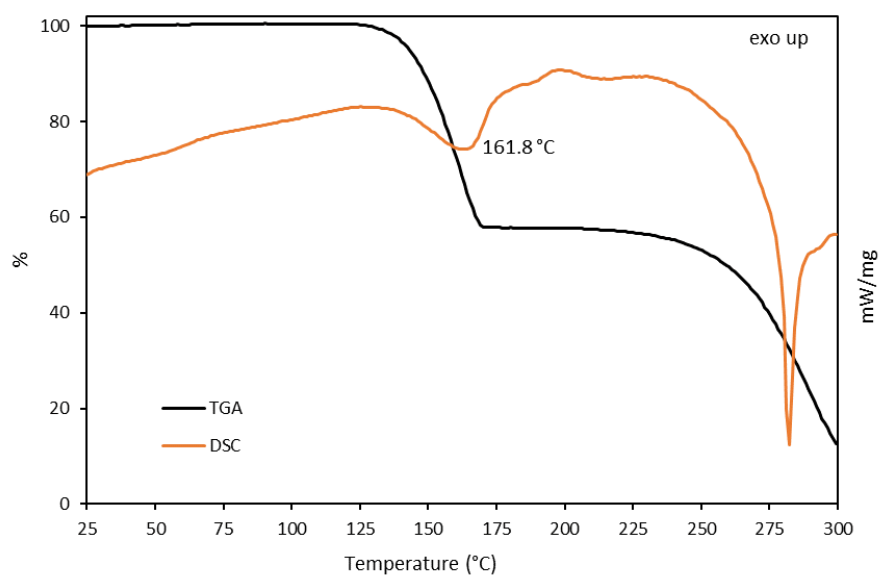

**Figure S11.** X-bonds angles in cocrystals **1-3**.

**a) Cocrystal 1 (THY-TFDIB)**

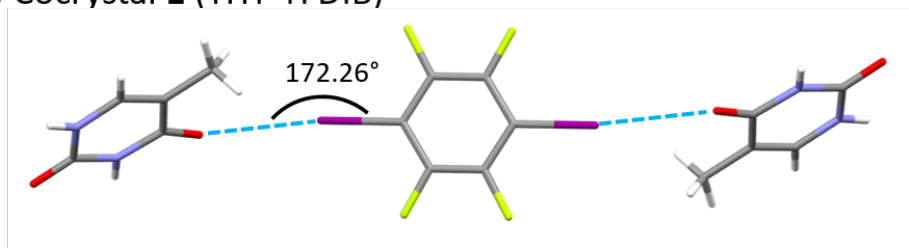

**b) Cocrystal 2 (1ETURA-TFDIB)**

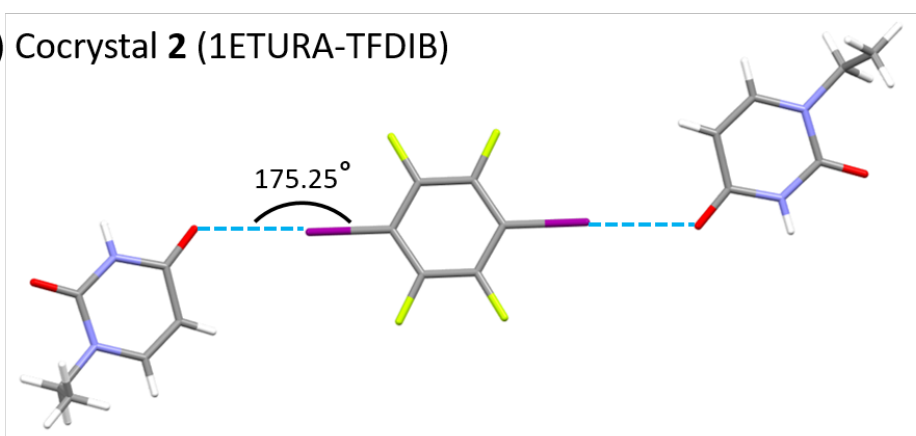

**c) Cocrystal 3 (5FU-TFDIB)**

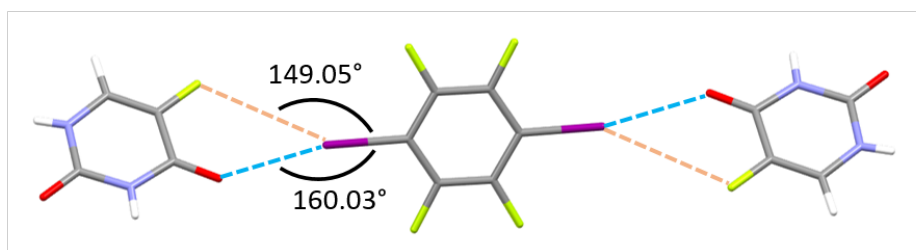

**Table S3.** Hydrogen bonds for cocrystals **1** (THY-TFDIB), **2** (1ETURA-TFDIB) and **3** (5FU-TFDIB) [Å and °].

| Cocrystal | D-H...A                | d(D-H)   | d(H...A) | d(D...A)  | <(DHA)  |
|-----------|------------------------|----------|----------|-----------|---------|
| <b>1</b>  | N(3)—H(3)···O(6) #1    | 0.86     | 2.06     | 2.920 (7) | 173     |
|           | N(1)—H(1)···O(2) #2    | 0.86     | 1.99     | 2.850 (7) | 174     |
| <b>2</b>  | N(3)-H(3)···O(2')      | 0.86     | 2.03     | 2.884(2)  | 172.7   |
|           | N(3')-H(3')···O(2)     | 0.86     | 2.02     | 2.864(2)  | 167.7   |
|           | C(7)-H(7A)···O(4) #3   | 0.97     | 2.51     | 3.335(3)  | 142.7   |
|           | C(7')-H(7'1)···O(4')   | 0.97     | 2.47     | 3.245(3)  | 137.2   |
| <b>3</b>  | N(1)—H(1)···O(12)      | 0.78 (4) | 2.06 (4) | 2.819 (4) | 167 (4) |
|           | N(3)—H(3)···O(12) #5   | 0.78 (4) | 2.03 (4) | 2.805 (4) | 174 (4) |
|           | C(6)—H(6)···O(4) #6    | 1.01 (4) | 2.41 (4) | 3.360 (5) | 157 (3) |
|           | N(11)—H(11)···O(2) #6  | 0.82 (5) | 2.02 (5) | 2.847 (4) | 177 (5) |
|           | N(13)—H(13)···O(2)     | 0.82 (5) | 1.96 (5) | 2.781 (4) | 173 (5) |
|           | C(16)—H(16)···F(1) #7  | 0.92 (4) | 2.59 (4) | 3.221 (5) | 127 (3) |
|           | C(16)—H(16)···O(14) #6 | 0.92 (4) | 2.51 (4) | 3.353 (5) | 153 (3) |

Symmetry transformations used to generate equivalent atoms:

#1  $-x, -y+1, -z+2$ ; #2  $-x-1, -y+2, -z+2$ .

#3  $x-1, y, z$ ; #4  $x+1, y, z$

#5  $x-1, y, z$ ; #6  $x+1, y, z$ ; #7  $-x+3/2, y-1/2, -z+3/2$ .
